# Supplementary material for: Cross-cultural adaptation and psychometric characteristics of the Chinese Version of the Obstetric Violence Scale: A Cross-sectional Study
Source: Research Square preprint supplement (doi:10.21203/rs.3.rs-8526035/v1), 2026-02-02
Supplement: Supplementary file 1 [file f351e4ddb4c0e858468834c2.docx]

| **Table S1** Results of Expert Consultation | | | | | | | | | |
| --- | --- | --- | --- | --- | --- | --- | --- | --- | --- |
| Expert | Theoretical Knowledge | Practical Experience | Reference to Domestic and International Materials | Personal Intuition | Familiarity Level | Ca | Cs | Cr | Kendall's Coefficient of Agreement |
| 1 | 0.10 | 0.50 | 0.10 | 0.10 | 0.80 | 0.93 | 0.91 | 0.92 | 0.52 |
| 2 | 0.30 | 0.50 | 0.10 | 0.10 | 1 |
| 3 | 0.30 | 0.50 | 0.10 | 0.10 | 1 |
| 4 | 0.10 | 0.50 | 0.10 | 0.10 | 1 |
| 5 | 0.30 | 0.50 | 0.10 | 0.10 | 0.80 |
| 6 | 0.20 | 0.50 | 0.10 | 0.10 | 0.80 |
| 7 | 0.30 | 0.50 | 0.10 | 0.10 | 1 |
| 8 | 0.30 | 0.40 | 0.10 | 0.10 | 1 |
| 9 | 0.30 | 0.50 | 0.10 | 0.10 | 0.80 |

| **Table S2** Content Validity | | | | | | | |
| --- | --- | --- | --- | --- | --- | --- | --- |
| Item | Average value | Standard Deviation | Minimum | Maximum | Coefficient of Variation | I-CVI | S-CVI/Ave |
| A1 | 4.000 | 0.000 | 4.000 | 4.000 | 0.000 | 1.000 | 0.952 |
| A2 | 3.000 | 0.500 | 2.000 | 4.000 | 0.167 | 0.889 |
| A3 | 3.110 | 0.601 | 2.000 | 4.000 | 0.193 | 0.889 |
| A4 | 3.670 | 0.500 | 3.000 | 4.000 | 0.136 | 1.000 |
| A5 | 3.780 | 0.441 | 3.000 | 4.000 | 0.117 | 1.000 |
| A6 | 4.000 | 0.000 | 4.000 | 4.000 | 0.000 | 1.000 |
| A7 | 3.780 | 0.441 | 3.000 | 4.000 | 0.117 | 1.000 |
| A8 | 3.890 | 0.333 | 3.000 | 4.000 | 0.086 | 1.000 |
| A9 | 3.110 | 0.601 | 2.000 | 4.000 | 0.193 | 0.889 |
| A10 | 3.780 | 0.441 | 3.000 | 4.000 | 0.117 | 1.000 |
| A11 | 3.000 | 0.500 | 2.000 | 4.000 | 0.167 | 0.889 |
| A12 | 4.000 | 0.000 | 4.000 | 4.000 | 0.000 | 1.000 |
| A13 | 3.110 | 0.601 | 2.000 | 4.000 | 0.193 | 0.889 |
| A14 | 3.110 | 0.601 | 2.000 | 4.000 | 0.193 | 0.889 |
